# Supplementary material for: Non-invasive ultrasonic neuromodulation of neuronal excitability for treatment of epilepsy
Source: PubMed Central journal article supplement (PMC7196311; doi:10.7150/thno.40520), 2020-04-12
Supplement: thnov10p5514s1.pdf [file thnov10p5514s1.pdf]

1 Figure S1: Construction and characterization of ultrasound waveforms with fundamental frequency of 750  
 2 kHz, acoustic pressure of 0.35 MPa ( $I_{SPPA} = 2.02 \text{ W/cm}^2$ ), TBD of 300  $\mu\text{s}$ , PRF of 1000 Hz, SD of 200 ms, and  
 3 ISI of 5 seconds for stimulation of monkey models. (A) A cross-sectional diagram of ultrasound energy  
 4 delivered to epileptogenic foci of monkey. (B) Acoustic field in XZ plane measured by a needle hydrophone  
 5 (Precision Acoustics, Dorchester, Dorset, UK). (C) Ultrasound pressure mapping acquired by a commercial  
 6 finite element method (FEM) software COMSOL Multiphysics. Acoustic field measured in XY plane by the  
 7 OptiSon® Ultrasound Beam Analyzer (Onda, USA), White scale bar = 1 cm.

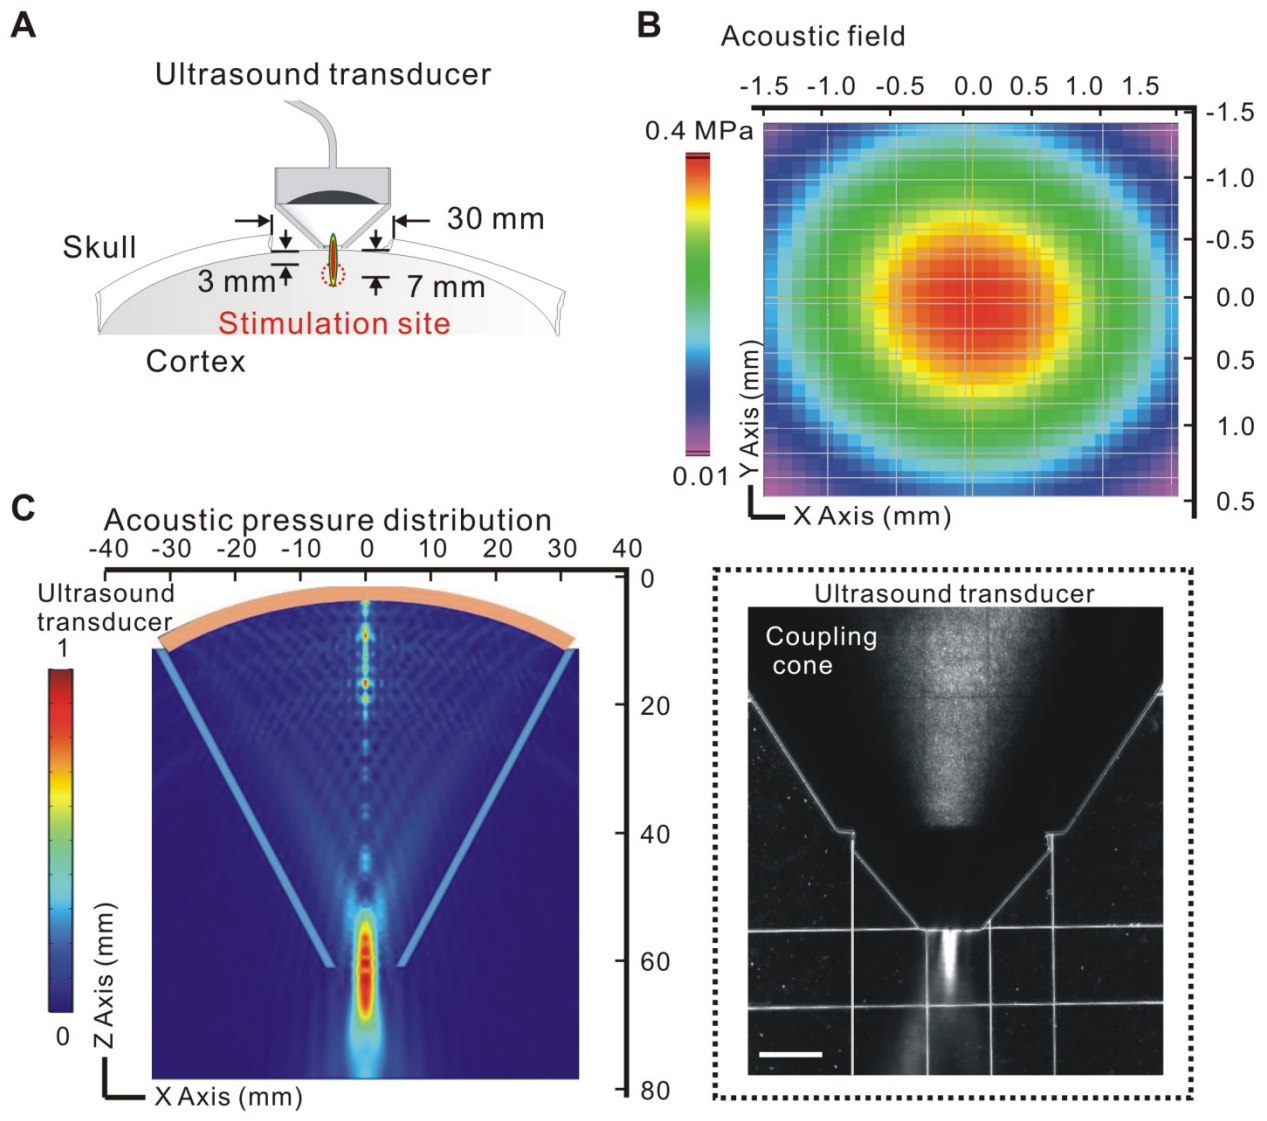

8  
9

10 Figure S2: Safety evaluation of 30 min ultrasound stimulation on epileptic monkey model. (A) Temperature  
11 monitoring after 30 min ultrasound stimulation was relatively small ( $0.69 \pm 0.044^\circ\text{C}$ ) (B) An example  
12 of histological examination indicated that ultrasound did not cause pathological damage in the epileptic  
13 monkey model.

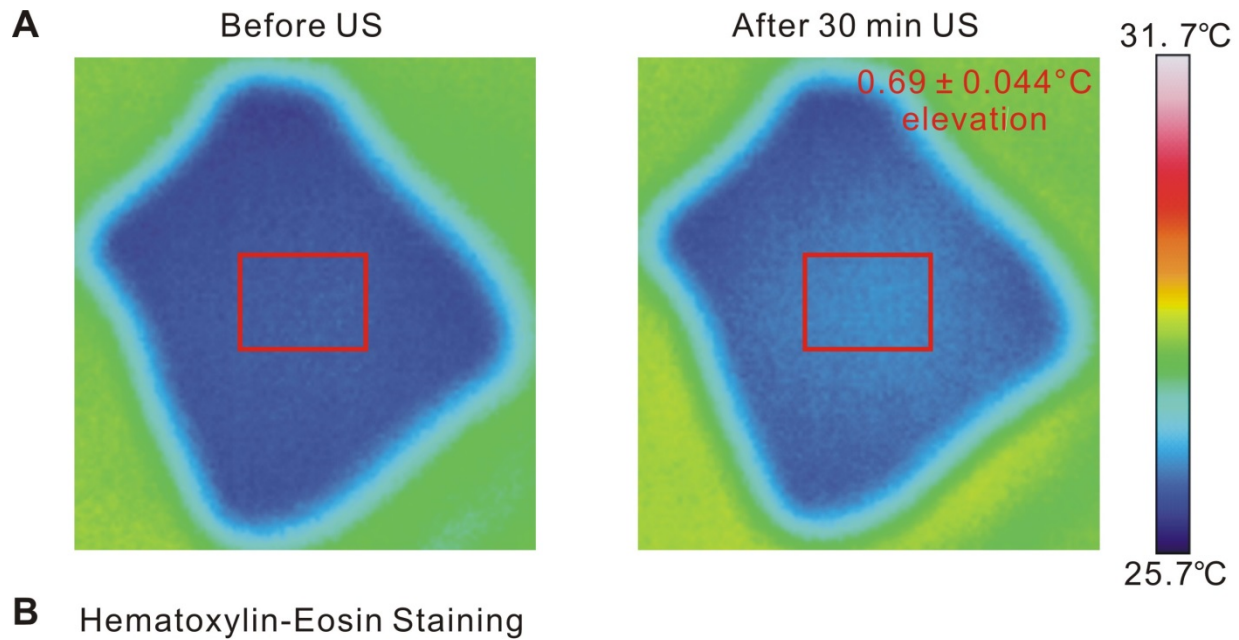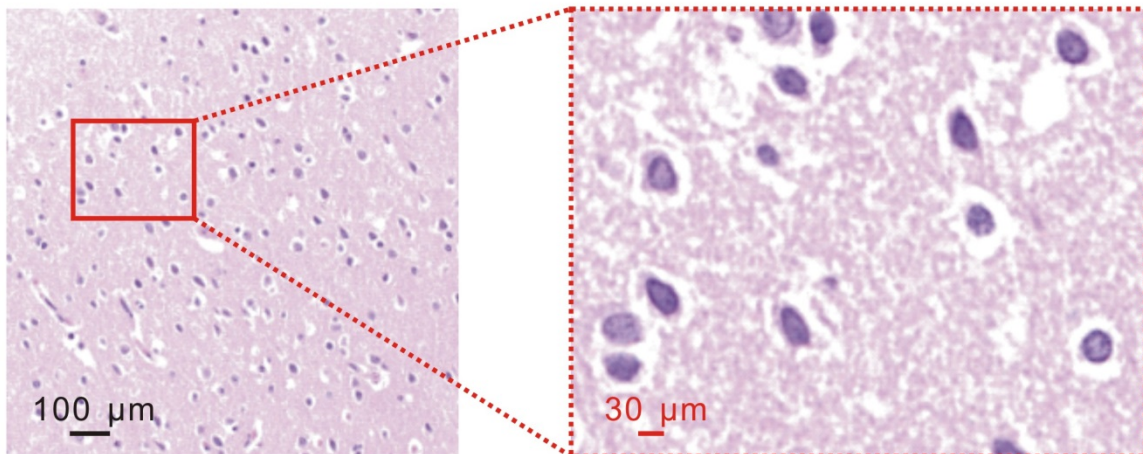

14

15

16 Figure S3: Evaluation of any audible sound produced by ultrasound transducer on epileptiform activities. (A) A  
17 cross-sectional diagram of ultrasound transducer was placed outside away from the monkey brain. (B) An  
18 example of epileptiform activities and calculated data indicated that ultrasound transducer placed away from  
19 the monkey brain had no significant effect on the epileptiform activities of epileptic monkey.

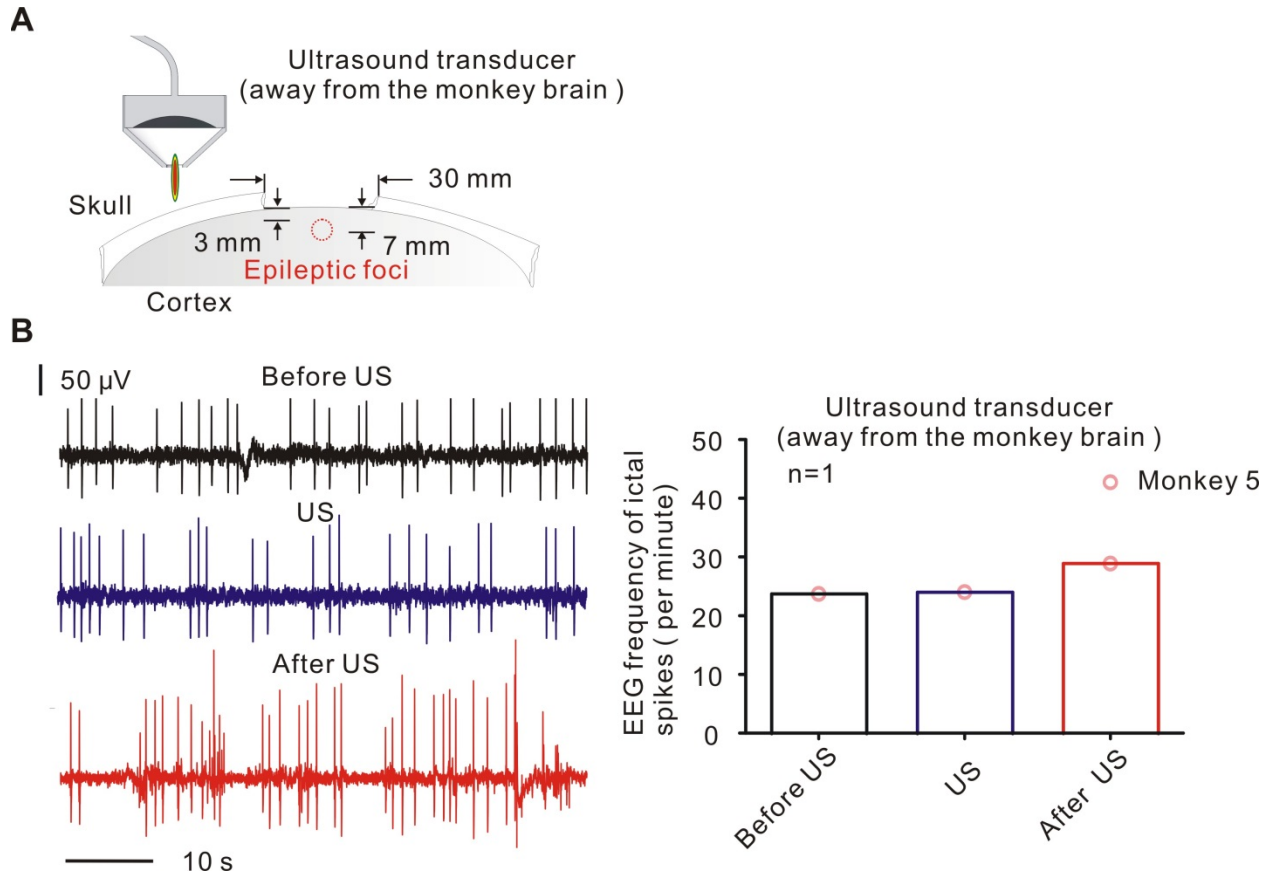

20

21

22 Table S1: Clinical characteristics of 12 TLE patients and 4 high-grade glioma patients.

| No.                                    | Age (y) | Sex | Side | EEG  |           | MRI* | Seizures |            |                | Neuropathology |     |      |        |
|----------------------------------------|---------|-----|------|------|-----------|------|----------|------------|----------------|----------------|-----|------|--------|
|                                        |         |     |      | IEDs | Ictal EEG |      | Auras    | Automatism | unilateral TCS | GTCs           | FCD | MTS  | others |
| <b>Twelve TLE patients</b>             |         |     |      |      |           |      |          |            |                |                |     |      |        |
| 1                                      | 2       | M   | L    | +    |           | +    |          |            | +              | +              | +   | +    |        |
| 2                                      | 25      | F   | R    | +    | +         |      | +        | +          | +              |                | +   |      |        |
| 3                                      | 43      | M   | R    | +    |           | +    | +        |            | +              |                | +   | GNT  |        |
| 4                                      | 31      | M   | R    | +    | +         | +    |          | +          | +              | +              | +   | +    |        |
| 5                                      | 31      | F   | L    | +    |           | +    | +        | +          |                |                |     | DNET |        |
| 6                                      | 18      | F   | L    | +    |           | +    |          | +          | +              | +              | +   | +    |        |
| 7                                      | 12      | M   | L    | +    |           | +    |          | +          | +              |                | +   |      |        |
| 8                                      | 19      | M   | L    | +    | +         | +    | +        | +          | +              |                | +   | +    |        |
| 9                                      | 18      | F   | L    | +    | +         | +    | +        | +          | +              |                | +   | +    |        |
| 10                                     | 10      | F   | L    | +    | +         | +    | +        | +          | +              | +              | +   |      |        |
| 11                                     | 32      | M   | L    | +    |           | +    | +        | +          | +              | +              |     | CHM  |        |
| 12                                     | 2       | F   | R    | +    |           | +    | +        | +          | +              | +              |     |      |        |
| 13                                     | 24      | M   | R    | +    | +         | +    | +        | +          |                | +              |     |      |        |
| 14                                     | 1       | F   | R    | +    |           | +    | +        | +          | +              | +              | +   | +    |        |
| 15                                     | 57      | F   | L    | +    | +         | +    | +        |            | +              | +              | +   |      |        |
| <b>Four high-grade glioma patients</b> |         |     |      |      |           |      |          |            |                |                |     |      |        |
| 1                                      | 51      | F   | R    |      |           | +    |          |            |                |                |     | GBM  |        |
| 2                                      | 41      | F   | L    |      |           | +    |          |            |                |                |     | AA   |        |
| 3                                      | 53      | M   | R    |      |           | +    |          |            |                |                |     | GBM  |        |
| 4                                      | 47      | M   | R    |      |           | +    |          |            |                |                |     | DA   |        |

23 Note. +, the patient had the signs and symptoms listed in this table; \*, MRI signal abnormalities; GTCs,  
 24 generalized tonic-clonic seizures; FCD, focal cortical dysplasia; MTS, mesial temporal sclerosis; IEDs,  
 25 interictal epileptiform discharges; TCS, tonic-clonic seizures; GNT, glioneuronal tumor; DNET,  
 26 dysembryoplastic neuroepithelial tumor; CHM, cavernous hemangioma; GBM, glioblastoma multiforme; AA,  
 27 anaplastic astrocytoma; DA, diffuse astrocytoma.

28

29 Figure S4: MRI imaging, EEGs recording and pathological assessments in a TLE patient. (A) Coronal turbo  
30 SE T2-weighted image (left) and transverse T2-weighted FLAIR image (right) showing the blurring of the  
31 gray matter-white matter boundaries and increased signal intensity in the temporal lobe (red arrow). (B)  
32 Epileptiform discharges in the TLE patient observed in interictal EEG. (C) Pathological sections from biopsy  
33 specimen of a TLE patients showing the key features of the biopsy specimen from TLE patient, including focal  
34 cortical dysplasia, and change of cellular morphology (Black bar, 1 mm; Red bar, 100  $\mu$ m; Blue bar, 20  $\mu$ m).  
35 (D) HE staining indicates an example of neuronophagia in which a dying neuron is surrounded by microglial  
36 cells (Black bar, 100  $\mu$ m; Red bar, 30  $\mu$ m). (E) Bielschowsky silver staining indicates an example of  
37 microvacuoles in neurons (Black bar, 100  $\mu$ m; Red bar, 30  $\mu$ m).

**A** Magnetic resonance imaging

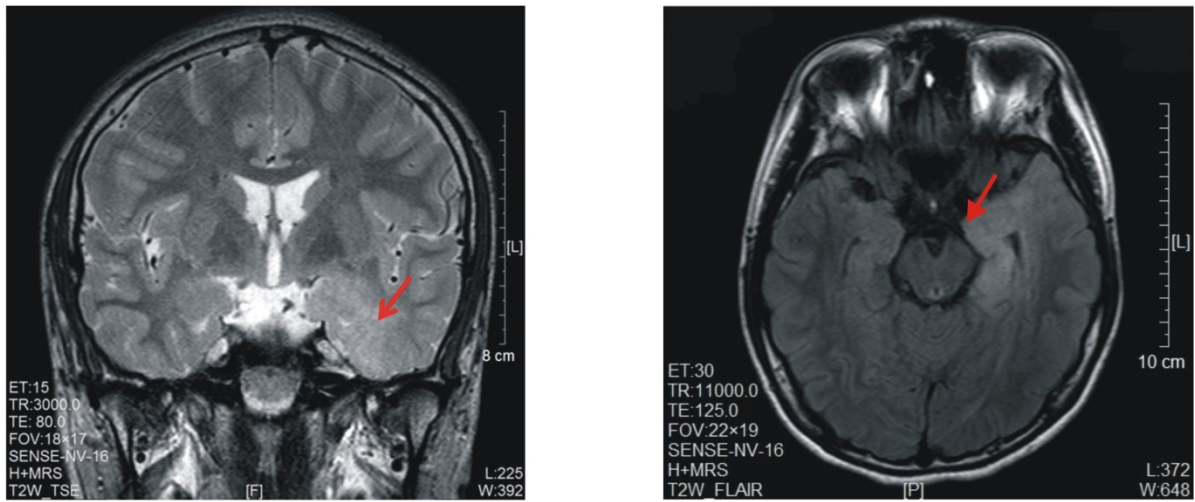

**B** Interictal Discharge

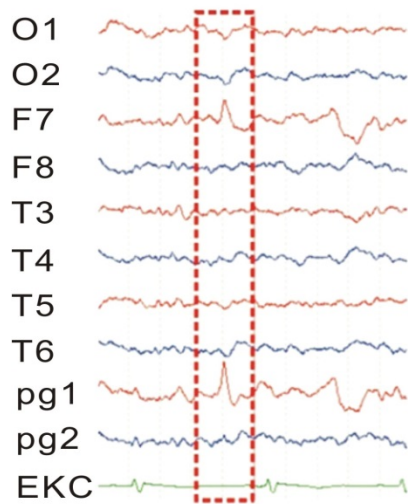

**C** Pathological sections

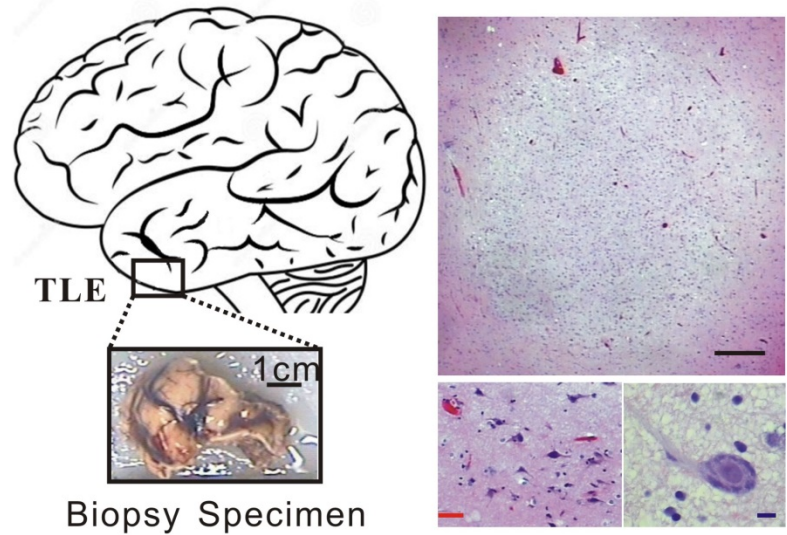

**D** Hematoxylin-Eosin Staining

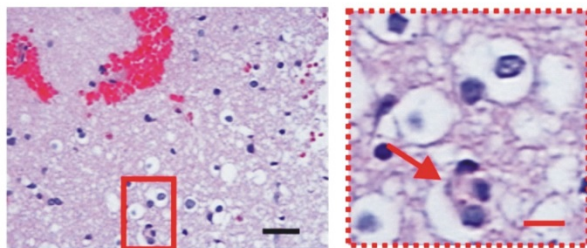

**E** Bielschowsky Sliver Staining

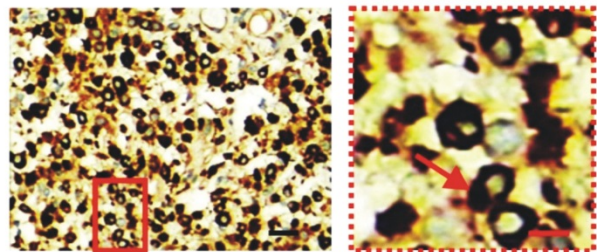

38

39

40 Figure S5: Construction and characterization of miniaturized ultrasound stimulation systems used for  
41 stimulation of brain slices. (A) Schematic illustration of the experimental setups for transmitting pulsed  
42 ultrasound waveforms into brain slices. Brain slices were visually recorded in the recording chamber which  
43 was perfused with artificial cerebrospinal fluid (ACSF). Pulsed surface acoustic waves (SAW) were generated  
44 by an arbitrary waveform generator and amplified by a power amplifier. IDTs, interdigital transducers. (B)  
45 Cross-sectional diagram of the ultrasound neuro-modulation chip was compatible with the recording chamber  
46 for patch-clamp recording. The distribution of the acoustic field was monitored in the recording chamber by a  
47 Laser Doppler Velocimetry. The energy of ultrasound was localized to the substrate surface, facilitating the  
48 stimulation of region-specific slice with relatively small input power. (C) Illustration of sonication pulsing  
49 schemes. TBD indicates tone-burst-duration; PRF, pulse repetition frequency.

### A Experimental setup

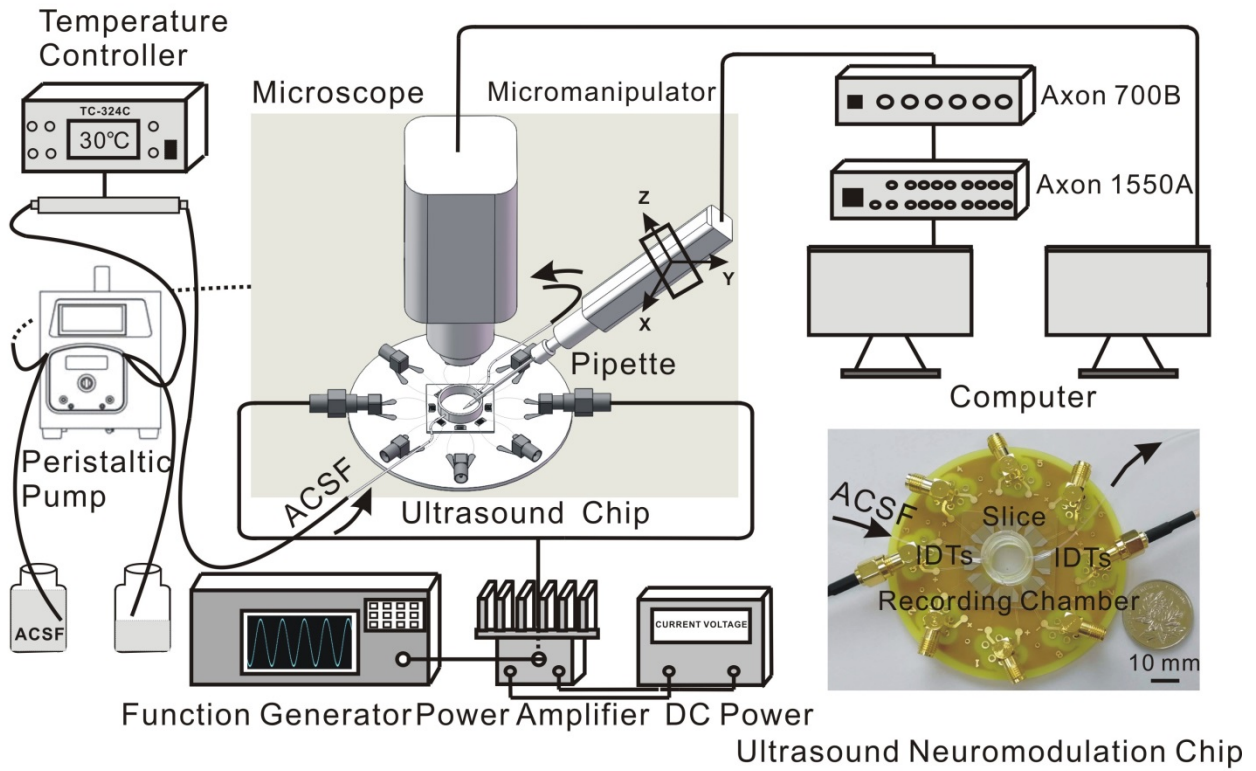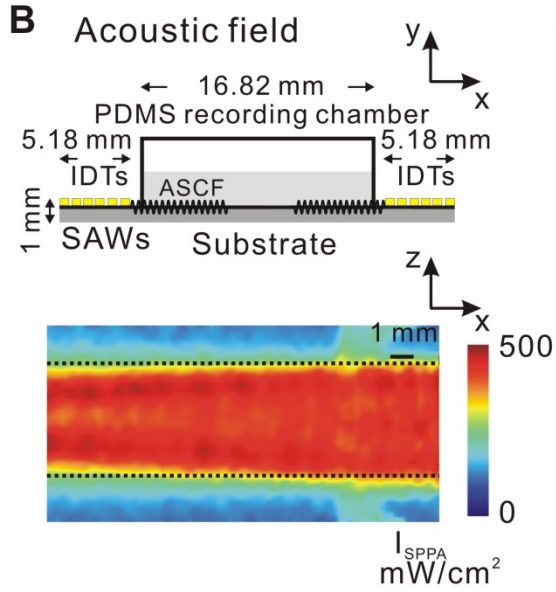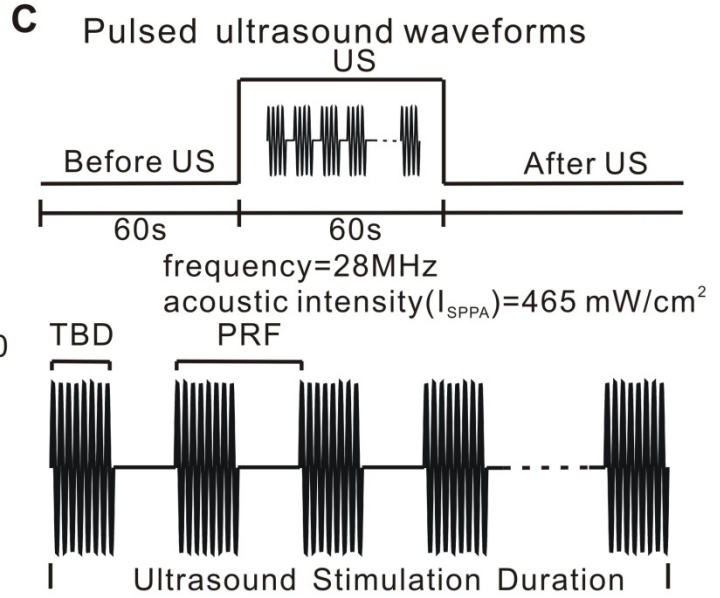



51 Figure S6: Bi-modal effect of ultrasound stimulation with 60 seconds pulsed ultrasound waveforms with  
 52 fundamental frequency of 28 MHz, and acoustic pressure of 0.13 MPa ( $I_{SPPA} = 465 \text{ mW/cm}^2$ ) on neuronal  
 53 excitability in mice cortical slices. (A) Seven neurons recorded from cortical slices of mice showing an  
 54 effective increase in the frequency of action potentials induced by 60 seconds ultrasound stimulation with 0.5  
 55 ms ultrasound pulses containing 14000 acoustic cycles at pulse repetition frequency (PRF) of 1000 Hz. (B)  
 56 Eight neurons recorded from cortical slices of mice showing an effective decrease in the frequency of action  
 57 potentials induced by 60 seconds of ultrasound stimulation with 5 ms ultrasound pulses containing 140000  
 58 acoustic cycles at pulse repetition frequency (PRF) of 100 Hz.

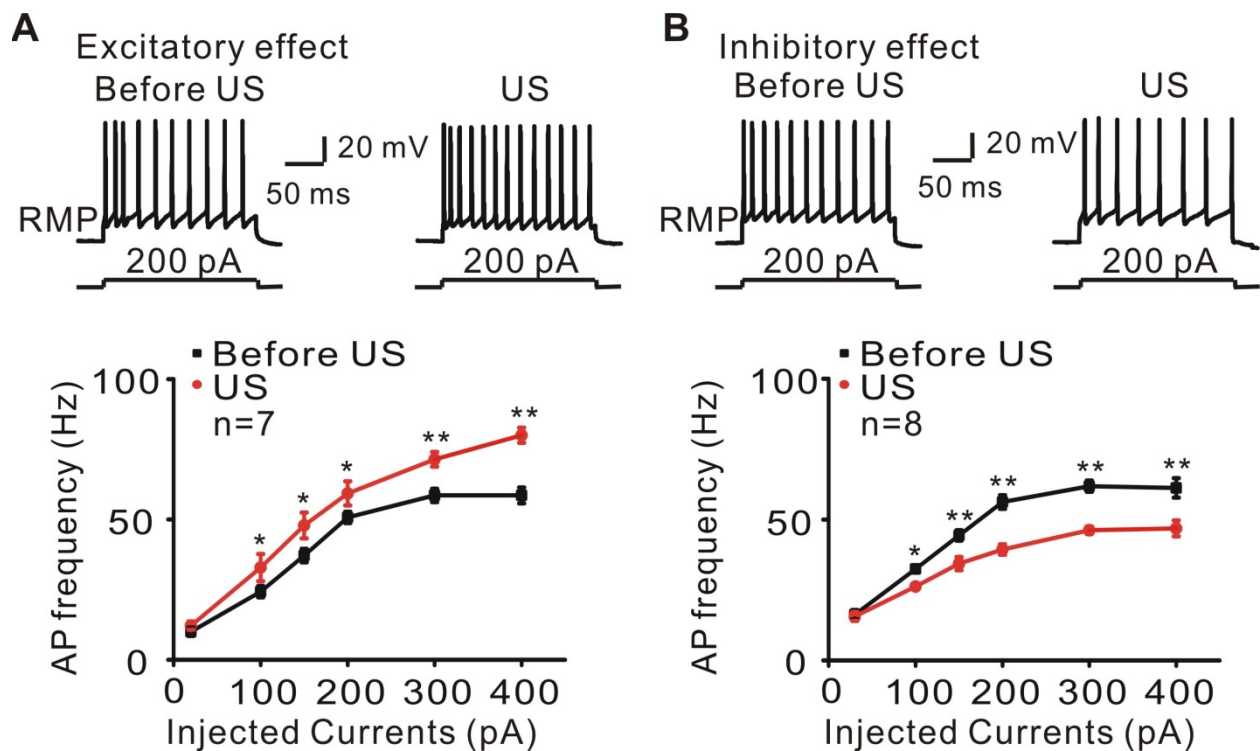

59

60

61 Figure S7: Ultrasound stimulation has no effect on properties of EPSCs and IPSCs. (A) No significant change  
62 was observed before US and during US in the amplitude, 10% - 90% rise-time, and half-width of EPSCs from  
63 12 neurons (amplitude: before US:  $99.48 \pm 8.96$  pA; US:  $100.22 \pm 9.18$  pA; rise-time: before US:  $1.83 \pm 0.04$   
64 ms; US:  $1.84 \pm 0.04$  ms; half-width: before US:  $5.99 \pm 0.09$  ms; US:  $5.97 \pm 0.09$  ms). (B) No significant  
65 change was observed before US and during US in the amplitude, 10% - 90% rise-time, and half-width of  
66 IPSCs from 13 neurons (amplitude: before US:  $91.34 \pm 9.53$  pA; US:  $92.98 \pm 10.18$  pA; rise-time: before US:  
67  $4.89 \pm 0.05$  ms; US:  $4.86 \pm 0.07$  ms; half-width: before US:  $17.14 \pm 0.21$  ms; US:  $17.13 \pm 0.18$  ms).

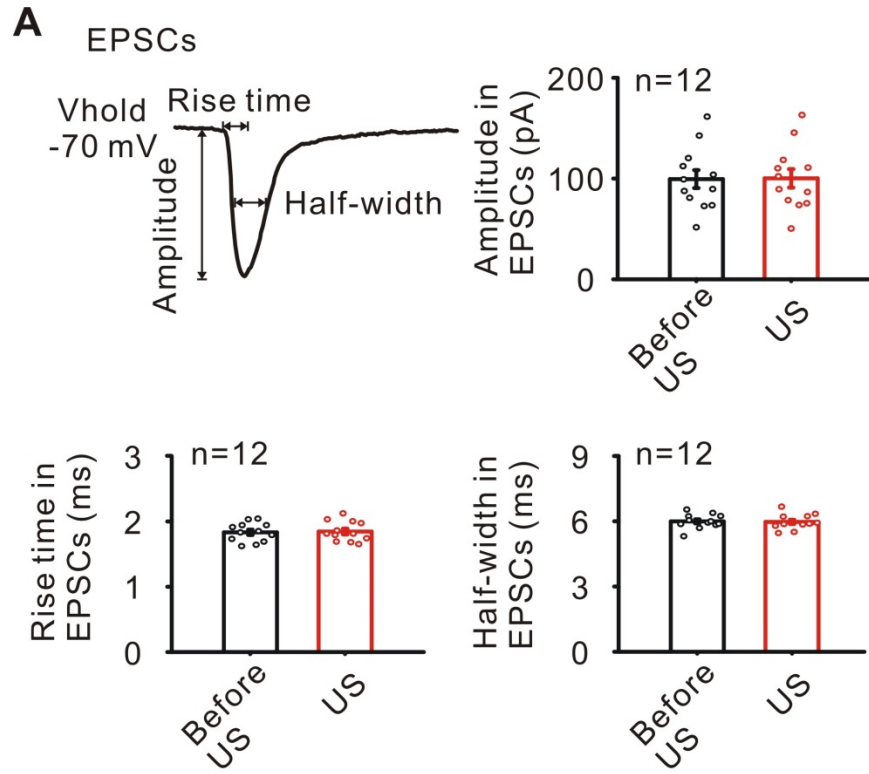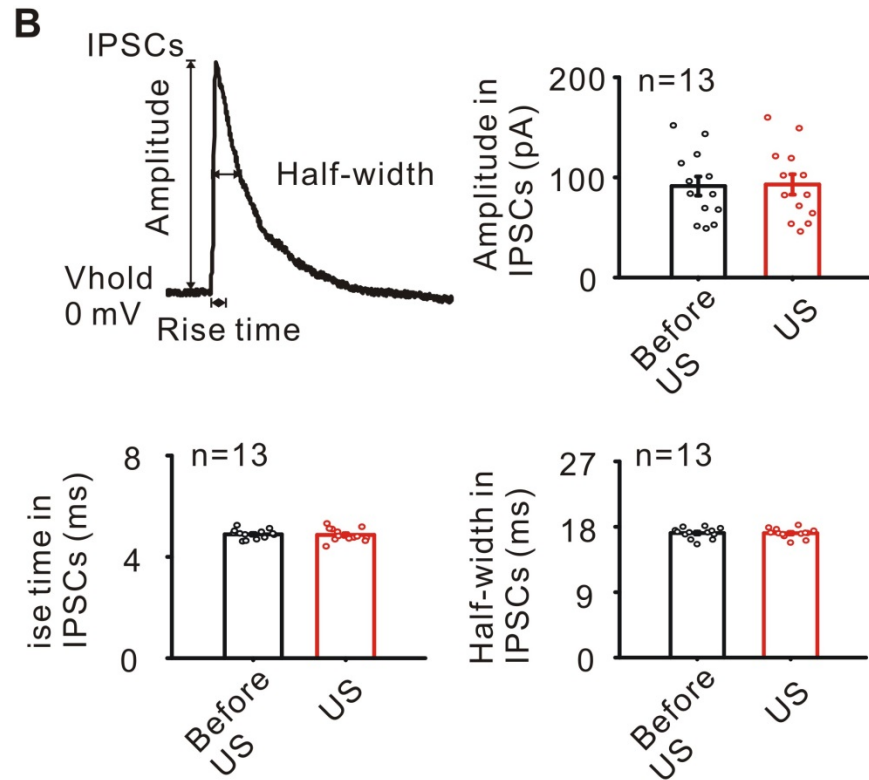

68

69

70 Figure S8: Inhibitory synaptic receptor antagonist, SR95531, blocks the inhibitory effect of epileptiform  
71 activities induced by ultrasound stimulation. (A) Representative traces of epileptiform discharges recorded  
72 from TLE patient's slices pretreated with SR-95531 (middle) in different recording phases (upper, 30s Before  
73 US, 60s US and After US). The events of epileptiform discharges did not change by ultrasound stimulation. (B-  
74 C) After adding GABA receptor antagonist, ultrasound stimulation hardly changed the normalized frequency  
75 of epileptiform discharges in 8 neurons (US:  $1.02 \pm 0.027$  Hz; After US:  $1.04 \pm 0.026$  Hz;  $P = 0.29$ , one-way  
76 ANOVA followed by LSD). (D-E) Ultrasound stimulation also did not change the waveform of spikes ( $326.18$   
77  $\pm 46.43$  pA to  $328.54 \pm 41.62$  pA,  $P = 0.31$ , Student's paired t-test for mean spikes amplitude;  $0.525 \pm 0.03$  ms  
78 to  $0.515 \pm 0.05$ ms,  $P = 0.39$ , Student's paired t-test for mean spikes half-width).

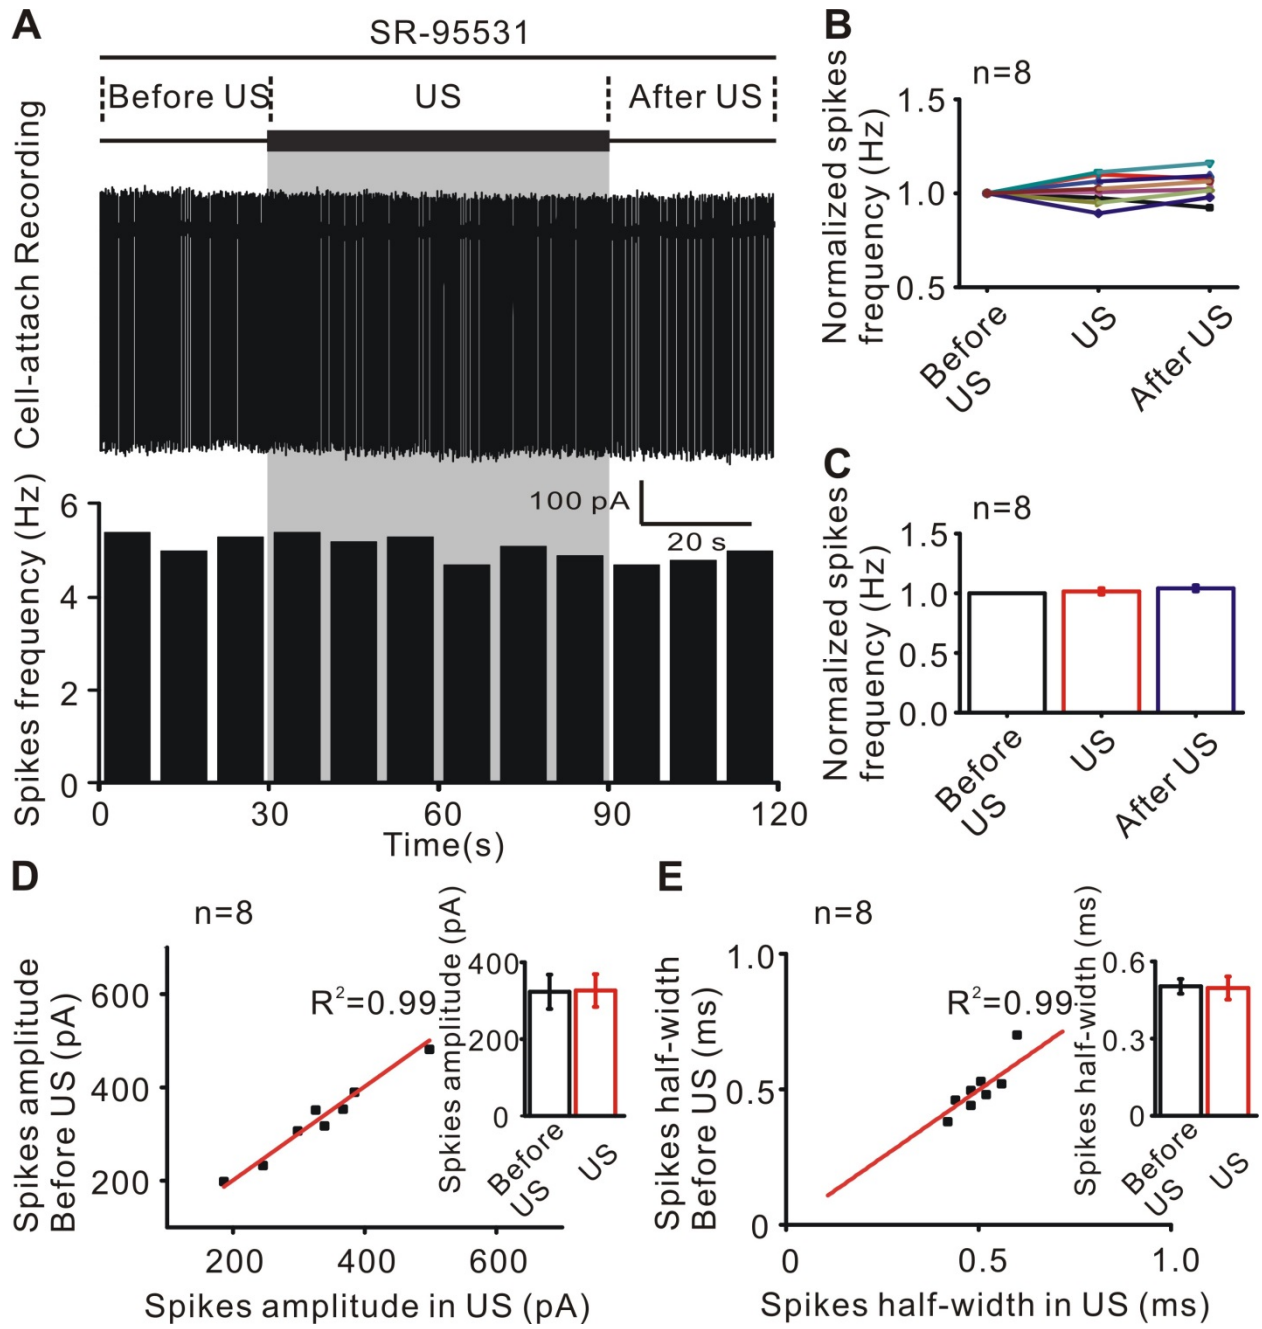

79

80

81 Figure S9: Monitoring of temperature during ultrasound stimulation. (A) Temperature elevation was measured  
 82 during ultrasound stimulation using a thermal infrared imager. The red rectangle indicates the  
 83 electrophysiological recorded area and the range of temperature monitoring. IDTs, interdigital transducers. (B)  
 84 A relatively small temperature elevation was observed during 60 second ultrasound stimulation and there was  
 85 no significant difference between two parameters (less than  $0.64 \pm 0.036^{\circ}\text{C}$  and  $0.63 \pm 0.007^{\circ}\text{C}$ ). (C-D) The  
 86 temperature profiles over the entire intervention period were visualized for different ultrasonic parameters.

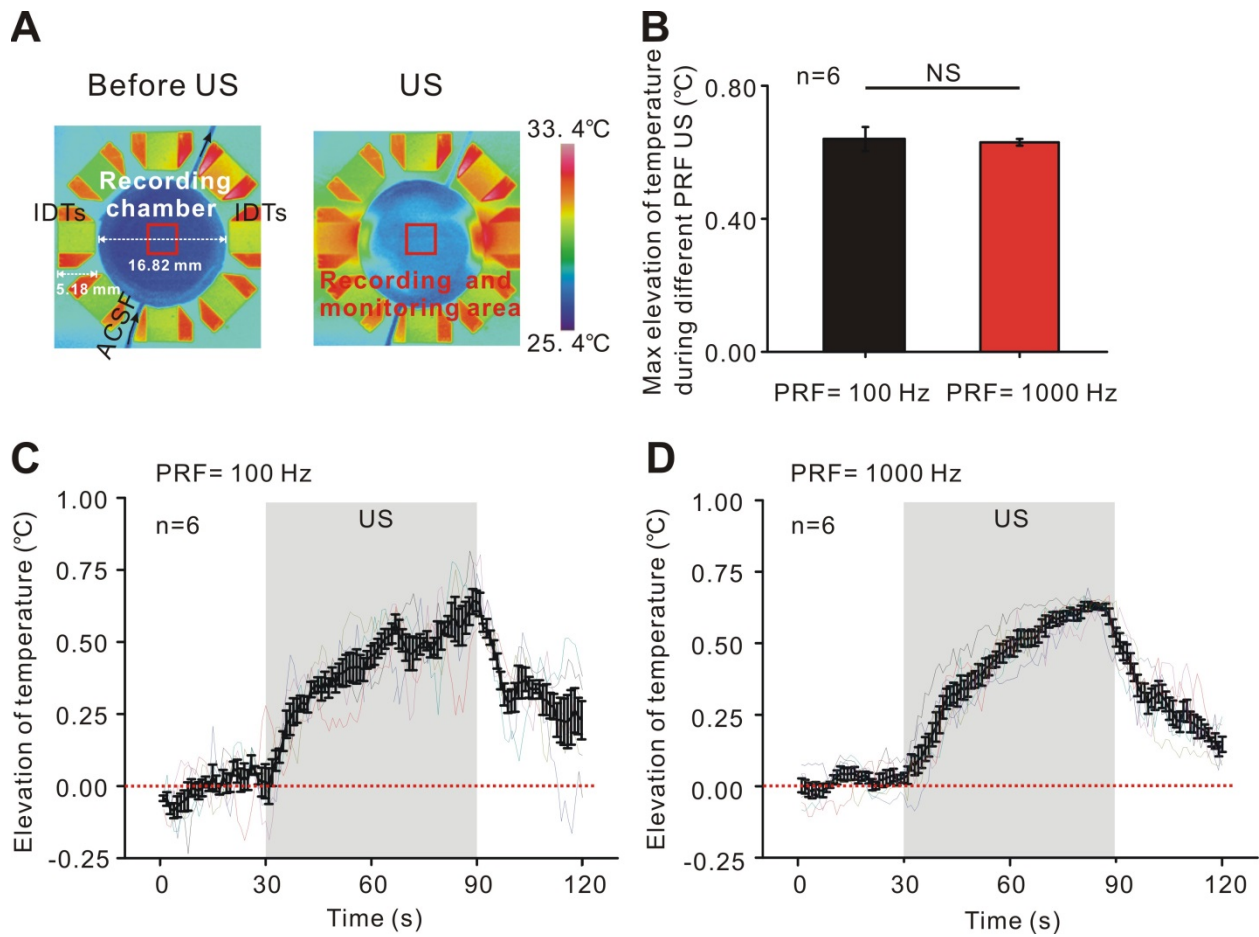

87

88

89 Fig. S10: Evaluation of temperature elevation produced by ultrasound transducer on epileptiform  
 90 activities. The temperature elevation in ACSF perfusion (2°C) had no effect on the epileptiform discharge (A-  
 91 C) and neuronal excitabilities (D-E) in epileptic brain slices.

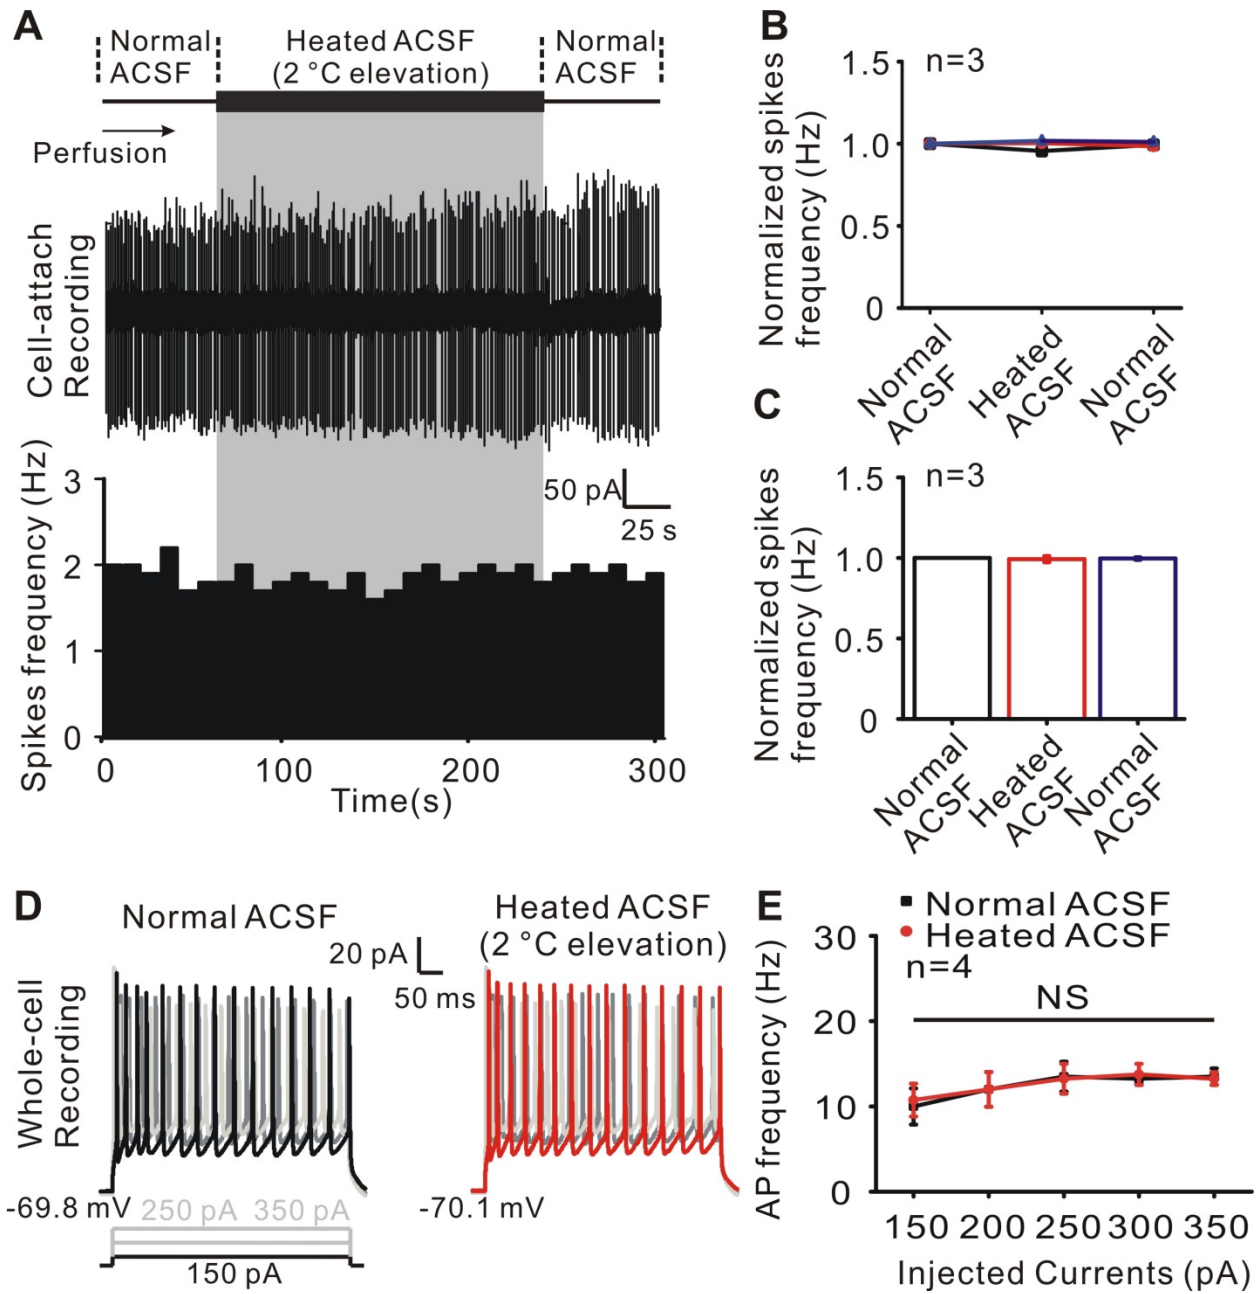

92

93

94 Fig. S11: Evaluation of acoustic resonant frequency of ultrasound neuro-modulation chip on epileptiform  
95 activities. Ultrasound at 6.57 MHz frequency could also decrease the firing frequency of pyramidal neurons in  
96 human epileptic slices (A-B).

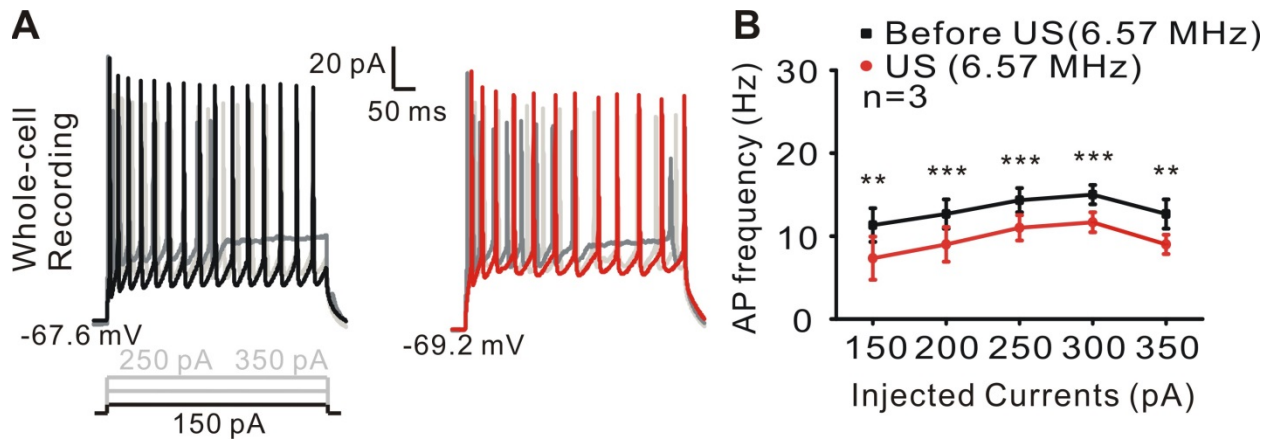

97
